# Supplementary material for: Mapping IgA Epitope and Cross-Reactivity between Severe Acute Respiratory Syndrome-Associated Coronavirus 2 and DENV
Source: MDPI journal article supplement (doi:10.3390/vaccines11121749), 2023-11-24
Supplement: s1 [file s1]

Figure S1: Multiple sequence alignment of the six-coronaviruses spike proteins deposited in the database with a higher degree of identity ( $\geq 97\%$ ) with SARS-CoV-2. BLAST was carried out in the UniProt (Universal Protein) database of the EBI (European Bioinformatics Institute), using the P0DTC2 protein from the SARS-CoV-2 as input. HCoV-NL63 (YP\_003767.1), HCoV-229E (NP\_073551.1), HCoV-HKU1 (Q14EB0.1), HCoV-OC43 (P36334.1), MERS-CoV (YP\_007188579.1), SARS-CoV-2 (P0DTC2), and SARS-CoV (P59594.1).

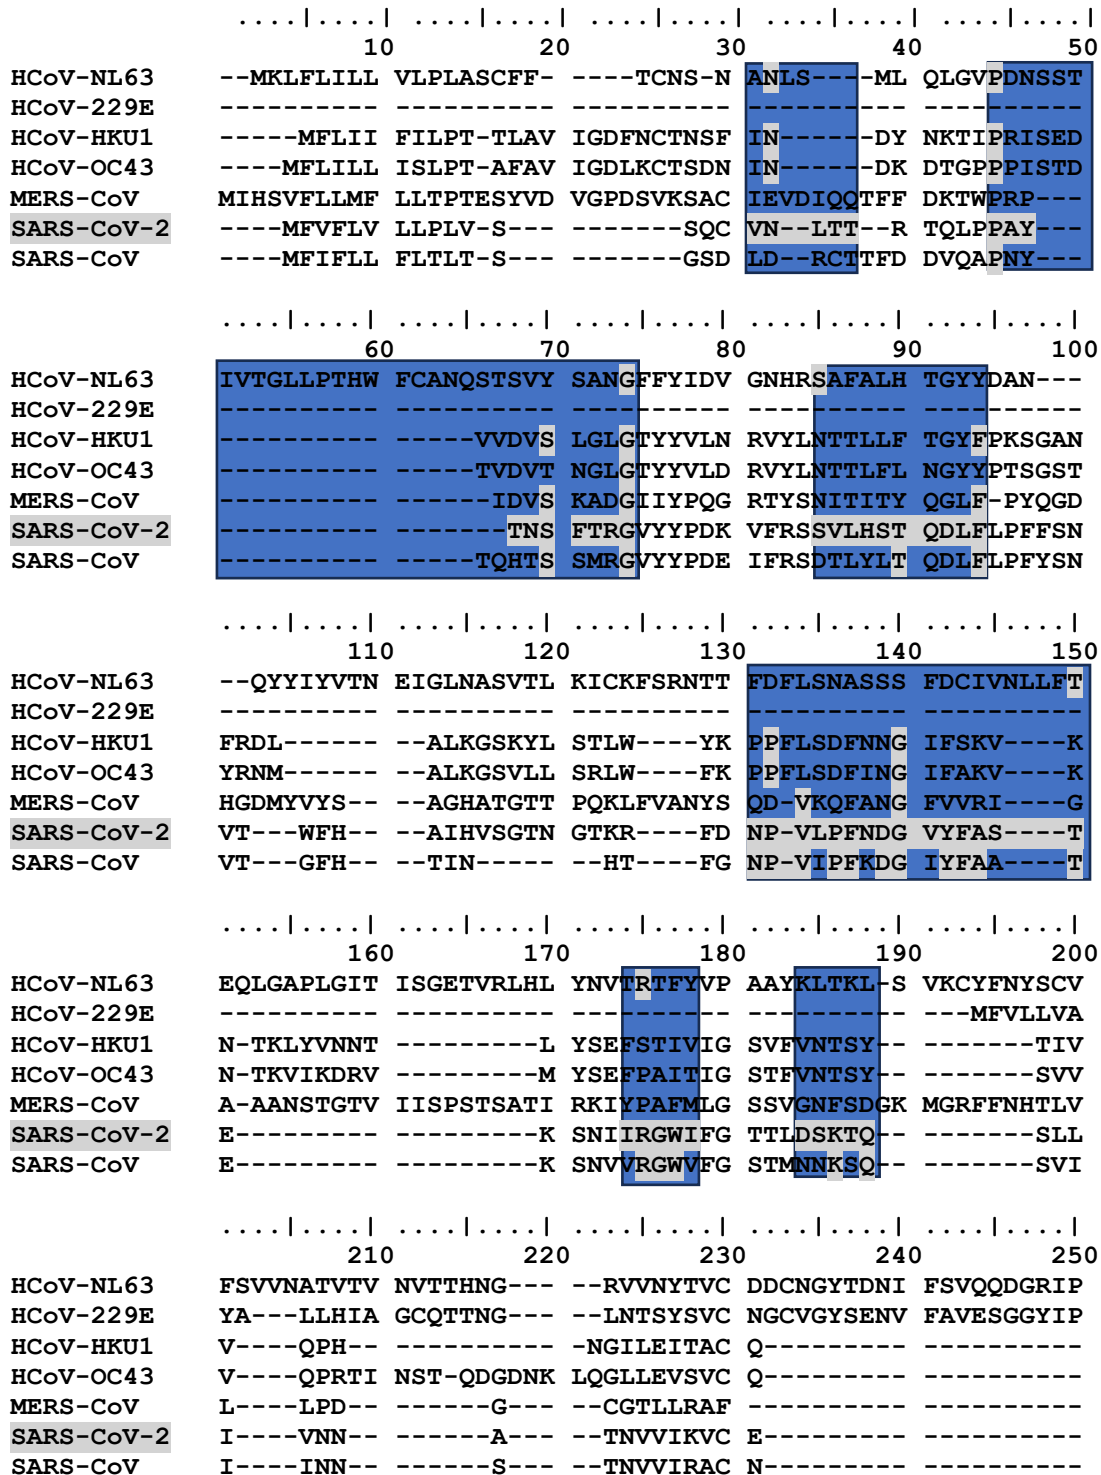

|            |                                                             |
|------------|-------------------------------------------------------------|
|            | ..... ..... ..... ..... ..... ..... ..... ..... ..... ..... |
|            | 260 270 280 290 300                                         |
| HCoV-NL63  | NGFPFNNWFL LTNGSTLVDG VSRLYQPLRL TCLWPVPGLK SSTGFVYF--      |
| HCoV-229E  | SDFAFNNWFL LTNTSSVVDG VVRSFQPLLL NCLWSVSGLR FTTGFVYF--      |
| HCoV-HKU1  | -----YT MCEYPHTVCK S-KGSIRN--                               |
| HCoV-OC43  | -----YN MCEYPQTICH PNLGNHRK--                               |
| MERS-CoV   | -----Y CILEPRSGNH CPAGNSYTSF                                |
| SARS-CoV-2 | -----FQ FCNDPFLGVY YHKNN----                                |
| SARS-CoV   | -----FE LCDNPFFAVS KPMGT-----                               |

|            |                                                             |
|------------|-------------------------------------------------------------|
|            | ..... ..... ..... ..... ..... ..... ..... ..... ..... ..... |
|            | 310 320 330 340 350                                         |
| HCoV-NL63  | ---NATGSDV NCGYQHNSV VD-----VMR YNLNFSANSL ---DNLKSG-       |
| HCoV-229E  | ---NGTGR-G DCKGFSSDVL SD-----VIR YNLNFEE--- ---NLRRG-       |
| HCoV-HKU1  | -----ESWH IDSSE-PLCL FKKNFYTNVS A-----DWL                   |
| HCoV-OC43  | -----ELWH LDTGV-VSCL YKRNFTYDVN A-----DYL                   |
| MERS-CoV   | ATYHTPATDC SDGNYNRNAS LNSFKEYFNL RNCTFMYTYN ITEDEILEWF      |
| SARS-CoV-2 | -----KSWM ESEFRVYSSA NNCTFEYVSQ PFLMDLEGKQ                  |
| SARS-CoV   | -----QTHMIFDNA FNCTFEYISD AFSLDVSEKS                        |

|            |                                                             |
|------------|-------------------------------------------------------------|
|            | ..... ..... ..... ..... ..... ..... ..... ..... ..... ..... |
|            | 360 370 380 390 400                                         |
| HCoV-NL63  | -----VIV FKTLYQDVLF YCSNSSSGV- ---LDTTIPFGP                 |
| HCoV-229E  | -----TIL FKTSYGVVVF YCTNNTLVS- ---GDAHIPFGT                 |
| HCoV-HKU1  | -----YFH FYQERG VFYA YYADV--G-- ---MP-T TFLFSLYLGT          |
| HCoV-OC43  | -----YFH FYQEGGTFYA YFTDT--G-- ---VV-T KFLFNVYLGM           |
| MERS-CoV   | GITQTAQG-V HLFSSRYVDL YGGN-----M FQFATLPVYD                 |
| SARS-CoV-2 | GNFKNLREFV FKNIDGYFKI YSKHTPINLV RDLPGQFSAL EPLVDLPIGI      |
| SARS-CoV   | GNFKHLREFV FKNKDGFLYV YKGYQPIDVV RDLPSGFNTL KPFIKFLPLGI     |

|            |                                                             |
|------------|-------------------------------------------------------------|
|            | ..... ..... ..... ..... ..... ..... ..... ..... ..... ..... |
|            | 410 420 430 440 450                                         |
| HCoV-NL63  | SSQPYCYFIN STINTTHVST FVGILPPTVR EIVVARTGQF YINGFKYFDL      |
| HCoV-229E  | VLGNFYCFVN TTIGNETTSF FVGALPKTVR EFVISRTGHF YINGRYFTL       |
| HCoV-HKU1  | ILSHYYVM-- ---PLTCK ---                                     |
| HCoV-OC43  | ALSHYYVM-- ---PLTCN ---                                     |
| MERS-CoV   | TIKYYSII-- ---PHSIR ---SI                                   |
| SARS-CoV-2 | NITRFQTL-- ---LALHR SYL-----TP                              |
| SARS-CoV   | NITNFRAL-- ---LTAFS ---                                     |

|            |                                                             |
|------------|-------------------------------------------------------------|
|            | ..... ..... ..... ..... ..... ..... ..... ..... ..... ..... |
|            | 460 470 480 490 500                                         |
| HCoV-NL63  | GFIEAVNFNV TTASATDFWT VAFATFVDVL VNVSATNIQN LLYCD-SPFE      |
| HCoV-229E  | GNVEAVNFNV TTAETTDECT VALASYADVL VNVSQTSIAN IIYCN-SVIN      |
| HCoV-HKU1  | -A----ISSN TDNETLEYWV TPLSRQYLL NFDEHGVITN AVDCSSSFLS       |
| HCoV-OC43  | -S----- --KLITLEYWV TPLTSRQYLL AFNQDGIIFN AEDCMSDFMS        |
| MERS-CoV   | QS-----DRKA W---AAFYV YKLQPLTFLL DFSVDGYIRR AIDCGFNDLS      |
| SARS-CoV-2 | GD-----SSSG WTAGAAAYYV GYLQPRTFLL KYNENGTITD AVDCALDPLS     |
| SARS-CoV   | -P-----AQDI WGTSAAYYFV GYLKPTTFML KYDENGITITD AVDCSQNPLA    |

|           |                                                             |
|-----------|-------------------------------------------------------------|
|           | ..... ..... ..... ..... ..... ..... ..... ..... ..... ..... |
|           | 510 520 530 540 550                                         |
| HCoV-NL63 | KLQCEHLQFG LQDGFYSANF LDDNVLPEY VALPIY----                  |
| HCoV-229E | RLRCDQLSFD VPDGFYSTSP IQSVELPVS VSLPVY----                  |
| HCoV-HKU1 | EIQCKTQSFA PNTGVYDL SGFTVKPVATVY RRIPNLPDCD IDNWLNNVSV      |
| HCoV-OC43 | EIKCKTQSIA PPTGVYELNG YTVQPIADV RRKPNLPNCN IEAWLNDKSV       |
| MERS-CoV  | QLHCSYESFD VESGVYSVSS FEAKPSGSV EQAEG-VECD FSPLLSTP         |

|            |             |             |              |             |             |
|------------|-------------|-------------|--------------|-------------|-------------|
| SARS-CoV-2 | ETKCTLKSFT  | VEKGIYQTSN  | FRVQPTESIV   | RFPNITNLCP  | FGEVFNATRF  |
| SARS-CoV   | ELKCSVKSE   | IDKGIYQTSN  | FRVVPBGDVV   | RFPNITNLCP  | FGEVFNATKF  |
|            | ..... ..... | ..... ..... | ..... .....  | ..... ..... | ..... ..... |
|            | 560         | 570         | 580          | 590         | 600         |
| HCoV-NL63  | -----YQHT   | DINFT-----  | -----ATASF   | GGSCYVCKPH  |             |
| HCoV-229E  | -----HKHT   | FIVLYV----- | -----DFKPQSG | GGKCFNCYPA  |             |
| HCoV-HKU1  | PSPLNWERRI  | FSNCNFNLSL  | LLRLVHVDSF   | SCNNLDKSKI  | FGSCFNSI--  |
| HCoV-OC43  | PSPLNWERKT  | FSNCNFMSS   | LMSFIQADSF   | TCNNIDAANK  | YGMCFSSI--  |
| MERS-CoV   | PQVYNFKRLV  | FTNCNYNLTK  | LLSLFSVNDF   | TCSQISPAAI  | ASNCYSSL--  |
| SARS-CoV-2 | ASVYAWNRRK  | ISNCVADYSV  | LYNSASFSTF   | KCYGVSPTKL  | NDLCFTNV--  |
| SARS-CoV   | PSVYAWERKK  | ISNCVADYSV  | LYNSTFFSTF   | KCYGVSATKL  | NDLCFSNV--  |
|            | ..... ..... | ..... ..... | ..... .....  | ..... ..... | ..... ..... |
|            | 610         | 620         | 630          | 640         | 650         |
| HCoV-NL63  | QVNISLNG--  | -----NTSVC  | VRTSHFSIRY   | IYNRVKSGSP  | GDSSWHIYLK  |
| HCoV-229E  | GVNITLANFN  | ET--KGPLC   | VDTSHTTKY    | VAVYA----   | NVGRWSASIN  |
| HCoV-HKU1  | ----TVDKFA  | IPNRRRDDLQ  | LGSSGFLQSS   | NYKIDISSSS  | CQLYYSPLPV  |
| HCoV-OC43  | ----TIDKFA  | IPNGRKVDLQ  | LGNLGYLQSF   | NYRIDTTATS  | CQLYYNLPAA  |
| MERS-CoV   | ----ILDYFS  | YPLSMKSDLS  | VSSAGPISQF   | NYKQSFSNPT  | CLILATVPHN  |
| SARS-CoV-2 | ----YADSFV  | IRGDEVQRQA  | PGQTGKIADY   | NYKLPDDFTG  | CVIAWNSNNL  |
| SARS-CoV   | ----YADSFV  | VKGDDVRQIA  | PGQTGVIADY   | NYKLPDDFMG  | CVLAWNTRNI  |
|            | ..... ..... | ..... ..... | ..... .....  | ..... ..... | ..... ..... |
|            | 660         | 670         | 680          | 690         | 700         |
| HCoV-NL63  | --SGTCPF--  | -----SFS    | KLNNFQ----   | -----KF     | KTICFSTVEV  |
| HCoV-229E  | --TGNCPF--  | -----SFG    | KVNNFV----   | -----KF     | GSVCFSLKDI  |
| HCoV-HKU1  | NVTINN-FNP  | SSWNRRYGFQ  | SFN-----     | --VSSYDVVY  | SDHCFSVNSD  |
| HCoV-OC43  | NVSISR-FNP  | STWNKRFGFI  | EDSVFKPRPA   | GVLTHNDVVY  | AQHCFKAPKN  |
| MERS-CoV   | LTTITKPLKY  | SYINKCSRFL  | SD-----DRT   | E-----V     | PQLVNA--NQ  |
| SARS-CoV-2 | DSKVGGNVNY  | LYRLFRKSNL  | KP-----FER   | D-----I     | STEIYQ--AG  |
| SARS-CoV   | DATSTGNVNY  | KYRYLRHGKL  | RP-----FER   | D-----I     | SNVPFS--PD  |
|            | ..... ..... | ..... ..... | ..... .....  | ..... ..... | ..... ..... |
|            | 710         | 720         | 730          | 740         | 750         |
| HCoV-NL63  | P-----      | GSCNF-----  | -----        | -----       | -----       |
| HCoV-229E  | P-----      | GGCAM-----  | -----        | -----       | -----       |
| HCoV-HKU1  | FCPCADPSVV  | NSCVKSKP--  | --LSAICPAG   | TKYRHCDLDT  | TLYVNNWCRC  |
| HCoV-OC43  | FCPCKLN---  | GSCVGSPPGK  | NNGIGTCPAG   | TNYLTCD---  | -----N      |
| MERS-CoV   | YSPCVSIVP-  | ST-VW-----  | -----EDG     | DYYRK-----  | -----       |
| SARS-CoV-2 | STPCNGVEG-  | FNCYF-----  | -----        | -----       | -----       |
| SARS-CoV   | GKPCTP-PA-  | LNCYW-----  | -----        | -----       | -----       |
|            | ..... ..... | ..... ..... | ..... .....  | ..... ..... | ..... ..... |
|            | 760         | 770         | 780          | 790         | 800         |
| HCoV-NL63  | ----PLEAT   | WHYT-----   | -----        | -----       | ----SYTIV   |
| HCoV-229E  | ----PIVAN   | WAYS-----   | -----        | -----       | ----KYYTI   |
| HCoV-HKU1  | SCLPDPISTY  | SPNTCPQKKV  | VVGIGEHCPCG  | LGINEEKCCTG | QLNHSSSCSCS |
| HCoV-OC43  | LCTPDPIFTT  | GTYPKCPQTKS | LVGIGEHCSCG  | LAVKSDYCGG  | ----NSCTCR  |
| MERS-CoV   | --QLSPLEGG  | GWL-----    | -----        | -----       | ----ASGSTVA |
| SARS-CoV-2 | ----PLQSY   | GFQP-----   | -----        | -----       | ----TNGVGYQ |
| SARS-CoV   | ----PLNDY   | GFYT-----   | -----        | -----       | ----TTGIGYQ |
|            | ..... ..... | ..... ..... | ..... .....  | ..... ..... | ..... ..... |
|            | 810         | 820         | 830          | 840         | 850         |
| HCoV-NL63  | GALYVTWSEG  | NSITGV----  | -----        | PYPV-----S  | GIREFSNLVL  |
| HCoV-229E  | GSLYVSWSDG  | DGITGV----  | -----        | PQPV-----E  | GVSSFMNVTL  |

|            |            |            |            |            |            |
|------------|------------|------------|------------|------------|------------|
| HCoV-HKU1  | PDAFLGWSFD | SCISNNRCNI | FSNFIFNGIN | SGTTCSN--D | LLYSNTEVST |
| HCoV-OC43  | PQAFLGWSAD | SCLQGDKCNI | FANFILHDVN | SGLTCST--D | LQKANTDIIL |
| MERS-CoV   | MTEQLQMGFG | IT-----    | ----VQYGT  | TNSVCPKLEF | ANDTKIASQL |
| SARS-CoV-2 | PYRVVVLSE  | LL-----    | -----HA    | PATVCGP--- | --KKSTNLVK |
| SARS-CoV   | PYRVVVLSE  | LL-----    | -----NA    | PATVCGP--- | --KLSTDLIK |

|            |            |            |            |            |            |
|------------|------------|------------|------------|------------|------------|
|            | 860        | 870        | 880        | 890        | 900        |
| HCoV-NL63  | NNCTKYNIYD | YVGTGIIRSS | NQSLAGGIT- | -YVSNSGNLL | G-FKNVSTGN |
| HCoV-229E  | DKCTKYNIYD | VSGVGIVRVS | NDTFLNGIT- | -YTSTSGNLL | G-FKDVTKGT |
| HCoV-HKU1  | GVCVNYDLYG | ITGQGIFKEV | SAAYYNNWQN | LLYDSNGNII | G-FKDFLTNK |
| HCoV-OC43  | GVCVNYDLYG | ILGQGIFVEV | NATYYNSWQN | LLYDSNGNLY | G-FRDYIINR |
| MERS-CoV   | GNCVEYSLYG | VSGRGVFQNC | TAVG-VRQQR | FVYDAYQNLV | GYYS--DGN  |
| SARS-CoV-2 | NKCVNFNFNG | LTGTGVLTES | NKKF-LPFQQ | FGRDIADTT- | DAVRDPQTLE |
| SARS-CoV   | NQCVNFNFNG | LTGTGVLTPS | SKRF-QPFQQ | FGRDVSDFT- | DSVRDPKTSE |

|            |            |            |            |            |            |
|------------|------------|------------|------------|------------|------------|
|            | 910        | 920        | 930        | 940        | 950        |
| HCoV-NL63  | IFIVTPCNQP | DQVAVYQQ-- | -----      | SIIGAMTAVN | ESRYGLQ--- |
| HCoV-229E  | IYSITPCNPP | DQLVVYQQ-- | -----      | AVVGAMLSN  | FTSYGFS--- |
| HCoV-HKU1  | TYTILPCYSG | RVSAAFY--Q | NSSSPALLYR | NLKCSYVLNN | IS--FIS--- |
| HCoV-OC43  | TFMIRSCYSG | RVSAAFH--A | NSSEPALLFR | NIKCNVVFNN | SLTRQLQ--- |
| MERS-CoV   | YYCLRACVSV | PVSVIYD--K | ETKTHATLFG | SVACEHISST | MSQYSRSTRS |
| SARS-CoV-2 | ILDITPCSFG | GVSVITPGTN | TSNQVAVLYQ | DVNCTEVPVA | IHADQLT--P |
| SARS-CoV   | ILDISPCSFG | GVSVITPGTN | ASSEVAVLYQ | DVNCTDVSTA | IHADQLT--P |

|            |            |            |            |            |            |
|------------|------------|------------|------------|------------|------------|
|            | 960        | 970        | 980        | 990        | 1000       |
| HCoV-NL63  | --NLLQLPNF | YYVSNGG--- | --NNCT---- | TAVMTYSNFG | ICADGSLIP- |
| HCoV-229E  | --NVVELPKF | FYASNGT--- | --YNCT---- | DAVLTYSSFG | VCADGSIIA- |
| HCoV-HKU1  | -----QPF   | YFDSYLGCVL | NAVNLTSYSV | SSCDLRMGSG | FCIDYALPSS |
| HCoV-OC43  | -----PIN   | YFDSYLGCVV | NAYNSTAISV | QTCDLTVGSG | YCVDYSK--N |
| MERS-CoV   | MLKRRDSTYG | PLQTPVGCVL | GLVNSS-LFV | EDCKLPLGQS | LCALPDTPST |
| SARS-CoV-2 | TWRVYSTGSN | VFQTRAGCLI | GAEHVN--NS | YECDIPIGAG | ICASYQTQT- |
| SARS-CoV   | AWRIYSTGNN | VFQTAGCLI  | GAEHVD--TS | YECDIPIGAG | ICASYHTVS- |

|            |            |            |            |             |             |
|------------|------------|------------|------------|-------------|-------------|
|            | 1010       | 1020       | 1030       | 1040        | 1050        |
| HCoV-NL63  | VRPR--NSS  | DNGIS----- | -----      | -AIITANLSI  | PSNWTTTSVQV |
| HCoV-229E  | VQPR--NVS  | YDSVS----- | -----      | -AIVTANLSI  | PSNWTTTSVQV |
| HCoV-HKU1  | RRKRRGISSP | YRFVT-FEPF | NVSFVNSDVE | TVGGLFEIQI  | PTNFTIAGHE  |
| HCoV-OC43  | RRSRGAITTG | YRFTN-FEPF | TVNSVNSDLE | PVGGLYEIQI  | PSEFTIGNMV  |
| MERS-CoV   | LTPRSVRSVP | GEMRLASIAF | NHPIQ-V-DQ | LNSSYFKLSI  | PTNFSEFVGTQ |
| SARS-CoV-2 | NSPRRARSVA | SQSI---IAY | TMSLG-AENS | VAYSNNNSIAI | PTNFTISVTT  |
| SARS-CoV   | L----LRSTS | QKSI---VAY | TMSLG-ADSS | IAYSNNNTIAI | PTNFSISITT  |

|            |            |            |            |            |             |
|------------|------------|------------|------------|------------|-------------|
|            | 1060       | 1070       | 1080       | 1090       | 1100        |
| HCoV-NL63  | EYLQITSTPI | VVDCATYVCN | GNPRCKNLLK | QYTSACKTIE | DALRLSAHLE  |
| HCoV-229E  | EYLQITSTPI | VVDCSTYVCN | GNVRCVELLK | QYTSACKTIE | DALRNSARLE  |
| HCoV-HKU1  | EFIQTSSPKV | TIDCSAFVCS | NYAACHDLLS | EYGTFCDNIN | SILNEVNDLL  |
| HCoV-OC43  | EFIQTSSPKV | TIDCAAFVCG | DYAACKSQLV | EYGSFCDNIN | AILTEVNELL  |
| MERS-CoV   | EYIQTTIQKV | TVDCQYVCN  | GFQKCEQLLR | EYGFCSKIN  | QALHGANLRQ  |
| SARS-CoV-2 | EILPVSMTKT | SVDCTMYICG | DSTECNLLL  | QYGSFCTQLN | RALTGIAVEQ  |
| SARS-CoV   | EVMPVMAKT  | SVDCNMYICG | DSTECANLLL | QYGSFCTQLN | RALSIGIAAEQ |

```

.....|.....|.....|.....|.....|.....|.....|.....|.....|.....|
1110      1120      1130      1140      1150
HCoV-NL63 TNDVSSMLTF DSNAFSLAN- ----VTSFGD -YNLSSVLPQ RNIRSSRIAG
HCoV-229E SADVSEMLTF DKKAFTLAN- ----VSSFGD -YNLSSVIPs LPTSGSRVAG
HCoV-HKU1 DITQLQVANA LMQGVTLSSN LNTNLHSDVD NIDFKSLLGC LGSQCGS-SS
HCoV-OC43 DTTQLQVANS LMNGVTLSTK LKDGVNFNVD DINFSPVLGC LGSECSKASS
MERS-CoV DDSVRNLFAS VKSSQSSPI- ----IPGFGG DFNLTLLEP- VSISTGSRSA
SARS-CoV-2 DKNTQEVFAQ VKQIYKTPP- ----IKDFGG F-NFSQILP- DP---SKPSK
SARS-CoV DENTREVFQA VKQMYKTPT- ----LKVFEGG F-NFSQILP- DP---IKPTK

```

```

.....|.....|.....|.....|.....|.....|.....|.....|.....|.....|
1160      1170      1180      1190      1200
HCoV-NL63 RSAIEDLLFS KVVTSGLGTV DVDYKSC-- KGLSIADLAC AQYYNGIMVL
HCoV-229E RSAIEDILFS KLVTSGLGTV DADYKKT-- KGLSIADLAC AQYYNGIMVL
HCoV-HKU1 RSLLEDLLFN KVKLSDVGfV E-AYNNCT-- GGSEIRDLLC VQSFNGIKVL
HCoV-OC43 RSAIEDLLFD KVKLSDVGfV E-AYNNCT-- GGAEIRDLIC VQSYKGIKVL
MERS-CoV RSAIEDLLFD KVTIADPGYM Q-GYDDCMQO GPASARDLIC AQYVAGYKVL
SARS-CoV-2 RSFIEDLLFN KVTIADAGFI K-QYGDCL-- GDIAARDLIC AQKFNGLTVL
SARS-CoV RSFIEDLLFN KVTIADAGFM K-QYGECL-- GDINARDLIC AQKFNGLTVL

```

```

.....|.....|.....|.....|.....|.....|.....|.....|.....|.....|
1210      1220      1230      1240      1250
HCoV-NL63 PGVADAERMA MYTGLSIGGM VLGGLTSA-- --AAIPFSLA LQARLNYVAL
HCoV-229E PGVADAERMA MYTGLSIGGI ALGGLTSA-- --VSIPFSLA IQARLNYVAL
HCoV-HKU1 PPILSETQIS GYTAAATVAA MFPPWSAA-- --AGVPFSLN VQYRINGLGV
HCoV-OC43 PPLISENQIS GYTAAATSAS LFPPWTAA-- --AGVPFYLN VQYRINGLGV
MERS-CoV PPLMDVNMEA AYTSSLLGSI AGVGWTAGLS SFAAIPFAQS IFYRLNGVGI
SARS-CoV-2 PPLLTDEMIA QYTSALLAGT ITSGWTFGAG AALQIPFAMQ MAYRFNGIGV
SARS-CoV PPLLTDDMIA AYTAALVSGT ATAGWTFGAG AALQIPFAMQ MAYRFNGIGV

```

```

.....|.....|.....|.....|.....|.....|.....|.....|.....|.....|
1260      1270      1280      1290      1300
HCoV-NL63 QTDVLQENQK ILAASFNKAI NNIVASFSSV NDAITQTAEA IHTVTIALNK
HCoV-229E QTDVLQENQK ILAASFNKAM TNIVDAFTGV NDAITQTSQA LQTVATALNK
HCoV-HKU1 TMDVLNKNQK LIANAFNKAL LSIQNGFTAT N----- ----SALAK
HCoV-OC43 TMDVLSQNQK LIANAFNNAL YAIQEGFDAT N----- ----SALVK
MERS-CoV TQQVLSQENQK LIANKFNQAL GAMQTGFTTT N----- ----EAFHK
SARS-CoV-2 TQNVLYENQK LIANQFNSAI GKIQDSLST A----- ----SALGK
SARS-CoV TQNVLYENQK QIANQFNKAI SQIQESLTTT S----- ----TALGK

```

```

.....|.....|.....|.....|.....|.....|.....|.....|.....|.....|
1310      1320      1330      1340      1350
HCoV-NL63 IQDVVNQOGS ALNHLTSQLR HNFQAISNSI QAIYDRLD SI QADQQVDR LI
HCoV-229E IQDVVNQOGN SLNHLTSQLR QNFQAISSSI QAIYDRLD TI QADQQVDR LI
HCoV-HKU1 IQSVVNANAA ALNSLLQQLF NKFGAISSSL QEILSR LDNL EAQVQIDR LI
HCoV-OC43 IQAVVNANAE ALNNLLQQLS NRFGAISASL QEILSR LDAL EAEAQIDR LI
MERS-CoV VQDAVNNNAQ ALSKLASELS NTFGAISASI GDIIQR LDVL EQDAQIDR LI
SARS-CoV-2 LQDVVNQNAQ ALNTLVKQLS SNFGAISSVL NDILSR LDKV EAEVQIDR LI
SARS-CoV LQDVVNQNAQ ALNTLVKQLS SNFGAISSVL NDILSR LDKV EAEVQIDR LI

```

```

.....|.....|.....|.....|.....|.....|.....|.....|.....|.....|
1360      1370      1380      1390      1400
HCoV-NL63 TGRILAALNAF VSQVLNKYTE VRGSRRLAQQ KINECVKSQS NRYGFCGNGT
HCoV-229E TGRILAALNVF VSHTLT KYTE VRASRQLAQQ KVNECVKSQS KRYGFCGNGT
HCoV-HKU1 NGRLTALNAY VSQQLSDITL IKAGASRAIE KVNECVKSQS PRINFCGNGN
HCoV-OC43 NGRLTALNAY VSQQLSDSTL VKFSAAQAME KVNECVKSQS SRINFCGNGN
MERS-CoV NGRLTTLNAF VAQQLVRSES AALSAQLAKD KVNECVKAQS KRS GF CGQT

```

|            |                       |            |            |            |
|------------|-----------------------|------------|------------|------------|
| SARS-CoV-2 | TGRLQSLQTY VTQQLIRAAE | IRASANLAAT | KMSECVLGQS | KRVDFCGKGY |
| SARS-CoV   | TGRLQSLQTY VTQQLIRAAE | IRASANLAAT | KMSECVLGQS | KRVDFCGKGY |

|            |                                                             |
|------------|-------------------------------------------------------------|
|            | ..... ..... ..... ..... ..... ..... ..... ..... ..... ..... |
|            | 1410 1420 1430 1440 1450                                    |
| HCoV-NL63  | HIFSIVNSAP DGLLFLHTVL LPTDYKNVKA WSGICVDGIY --GYVLRQPN      |
| HCoV-229E  | HIFSIVNAAP EGLVFLHTVL LPTQYKDVEA WSGLCVDGTN --GYVLRQPN      |
| HCoV-HKU1  | HILSLVQNAF YGLLFIHFSY KPTSFKTVLV SPGLCLSGDR --GIAPKQGY      |
| HCoV-OC43  | HIISLVQNAF YGLYFIHFSY VPTKYVTARV SPGLCIAGDR --GIAPKSGY      |
| MERS-CoV   | HIVSFVFNAP NGLYFMHVG YPSNHIEVVS AYGLCDAANP TNCIAPVNGY       |
| SARS-CoV-2 | HLMSFPQSAP HGVVFLHVTY VPAQEKNTTT APAICHGKA ---HFPREGV       |
| SARS-CoV   | HLMSFPQAAP HGVVFLHVTY VPSQERNFTT APAICHEGKA ---YFPREGV      |

|            |                                                             |
|------------|-------------------------------------------------------------|
|            | ..... ..... ..... ..... ..... ..... ..... ..... ..... ..... |
|            | 1460 1470 1480 1490 1500                                    |
| HCoV-NL63  | LVLY---SDN GVFRVTSRVM FQPRLPVLSF FVQIYNCNVT FVNISRVEL-      |
| HCoV-229E  | LALY---KEG NYRITSRIM FEPRIPTMAD FVQIENCNVT FVNISRSEL-       |
| HCoV-HKU1  | FIKQ-----N DSWMFTGSS YYPEPISDKN VVFMNSCSVN FTKAPFIYL-       |
| HCoV-OC43  | FVNV-----N NTWMTGSGY YYPEPITENN VVMSTCAVN YTKAPYVML-        |
| MERS-CoV   | FIKTNNTRIV DEWSTGSSF YAPEPITSLN TKYVAPQVTY QN-ISTNLPP       |
| SARS-CoV-2 | FVSN-----G THWFTQRNF YEPQIITTDN TFSVGNCDVV IGIIVNTVYD       |
| SARS-CoV   | FVFN-----G TSWFITQRNF FSPQIITTDN TFSVGNCDVV IGIINNTVYD      |

|            |                                                             |
|------------|-------------------------------------------------------------|
|            | ..... ..... ..... ..... ..... ..... ..... ..... ..... ..... |
|            | 1510 1520 1530 1540 1550                                    |
| HCoV-NL63  | -HTVIPDYVD VNKTLQEFQ NLPKYVKPNF -DLTPFNLT YLNLSELKQL        |
| HCoV-229E  | -QTIVPEYID VNKTLQELSY KLPNYTVPDL -VVEQYNQTI LNLTSISTL       |
| HCoV-HKU1  | -NNSIPNLSD FEAELSFWFK NHTSI-APNL TFNSHINATF LDLYY----       |
| HCoV-OC43  | -NTSIPNLPD FKEELDQWFK NQTSV-APDL SLD-YINVTF LDLYQV----      |
| MERS-CoV   | PLLGSTGID FQDELDEFK NVSTS-IPNF GSLTQINTTL LDLYY----         |
| SARS-CoV-2 | PLQ--PELDS FKEELDKYFK NHTSP-DVDL GDISGINASV VNIQK----       |
| SARS-CoV   | PLQ--PELDS FKEELDKYFK NHTSP-DVDL GDISGINASV VNIQK----       |

|            |                                                             |
|------------|-------------------------------------------------------------|
|            | ..... ..... ..... ..... ..... ..... ..... ..... ..... ..... |
|            | 1560 1570 1580 1590 1600                                    |
| HCoV-NL63  | EAKTASLFQT TVELQGLIDQ INSTYVDLKL LNRFFENYIKW PWWVWLIISV     |
| HCoV-229E  | ENKSAELNYT VQKLQTLIDN INSTLVDLKW LNRVETYIKW PWWVWLCISV      |
| HCoV-HKU1  | -----E MNVIQESIKS LNSSFINKLKE IGTYEMYVKW PWYIWLIV           |
| HCoV-OC43  | -----E MNRLQEAIVK LNQSYINKLKE IGTYEYVVKW PWYVWLLICL         |
| MERS-CoV   | -----E MSLQQVVKV LNESYIDLKE LGNYTYYNKW PWYIWLGFIA           |
| SARS-CoV-2 | -----E IDRLNEVAKN LNESLIDLQE LGKYEQYIKW PWYIWLGFIA          |
| SARS-CoV   | -----E IDRLNEVAKN LNESLIDLQE LGKYEQYIKW PWYVWLGFA           |

|            |                                                             |
|------------|-------------------------------------------------------------|
|            | ..... ..... ..... ..... ..... ..... ..... ..... ..... ..... |
|            | 1610 1620 1630 1640 1650                                    |
| HCoV-NL63  | VFVLLSLLV FCCLSTGCCG CCNCLTSSMR GCCDCGSTKL PYYEFKVVH        |
| HCoV-229E  | VLIFVVSMLL LCCCSTGCCG FFSCFASSIR GCCE--STKL PYYDVEKIHI      |
| HCoV-HKU1  | LFIIFLMILF FICCTGCGS ACF----- S--KCHNCCD EYGGHNDFVI         |
| HCoV-OC43  | AGVAMLVLLF FICCTGCGT SCF----- K--KCGGCCD DYTGYQELVI         |
| MERS-CoV   | GLVALALCVF FILCCTGCGT NCM----- GKLKCNRCCD RYEEYDLEPH        |
| SARS-CoV-2 | GLIAIVMTI MLCCMTSCCS CLK----- GCCSCGSCK F-DEDDSEPV          |
| SARS-CoV   | GLIAIVMTI LLCCMTSCCS CLK----- GACSCGSCK F-DEDDSEPV          |

|            |           |
|------------|-----------|
| HCoV-NL63  | Q-----    |
| HCoV-229E  | Q-----    |
| HCoV-HKU1  | K-ASHDD-- |
| HCoV-OC43  | K-TSHDD-- |
| MERS-CoV   | KVHVH---- |
| SARS-CoV-2 | LKGVKLHYT |
| SARS-CoV   | LKGVKLHYT |

Figure S2: Analysis of pre-pandemic sera from patients with DENV ( $n = 24$ ) and sera from hospitalized patients with SARS-CoV-2 (first wave) using a commercial enzyme-linked immunosorbent assay for IgA-SARS-CoV-2. The methodology described by the manufacturer (Serion Immunomat, Würzburg, Germany).

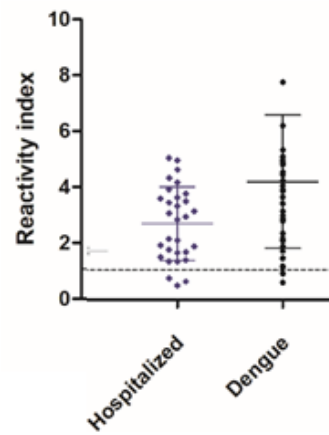



**Table S1.** Clinical characteristics of COVID-19 patients sera used in the study. <sup>1</sup>Mild Illness: Individuals presenting with various signs and symptoms of COVID-19, such as cough, fever, sore throat, malaise, headache, myalgias, nausea, vomiting, gastrointestinal symptoms, and loss of taste and smell. However, they do not exhibit shortness of breath, dyspnea, or abnormal chest imaging. <sup>2</sup>Moderate Illness: Individuals who display evidence of lower respiratory disease during clinical assessment or imaging and maintain an oxygen saturation measured by pulse oximetry (SpO<sub>2</sub>) of  $\geq 94\%$  while breathing room air at sea level. <sup>3</sup>Severe Illness: Individuals with a SpO<sub>2</sub> measurement of  $< 94\%$  on room air at sea level, a ratio of arterial partial pressure of oxygen to fraction of inspired oxygen (PaO<sub>2</sub>/FiO<sub>2</sub>) below 300 mm Hg, a respiratory rate exceeding 30 breaths per minute, or lung infiltrates covering more than 50% of their lung field.

|                  | <b>COVID<br/>(n= 33)</b> | <b>Mild<sup>1</sup><br/>(n= 5)</b> | <b>Mod<sup>2</sup><br/>(n=12)</b> | <b>Severe<sup>3</sup><br/>(n=16)</b> | <b>p-<br/>value</b> |
|------------------|--------------------------|------------------------------------|-----------------------------------|--------------------------------------|---------------------|
| Median Age (IQR) | (27–48)                  | (26–39)                            | (27–47)                           | (41–58)                              | <0.001              |
| Age group, n (%) | 100                      | 15.16                              | 36.36                             | 48.48                                | <0.001              |
| • < 20           | 4 (50)                   | 2 (25)                             | 1 (12.5)                          | 1 (12.5)                             |                     |
| • 20–39          | 17 (50)                  | 1 (2.94)                           | 10 (29.41)                        | 6 (17.64)                            |                     |
| • 40–59          | 12 (50)                  | 2 (8.33)                           | 1 (4.16)                          | 9 (37.50)                            |                     |
| Male, n (%)      | 19 (50)                  | 3 (7.89)                           | 7 (18.42)                         | 9 (23.68)                            | <0.001              |

<sup>1</sup>Mild Illness: Individuals presenting with various signs and symptoms of COVID-19, such as cough, fever, sore throat, malaise, headache, myalgias, nausea, vomiting, gastrointestinal symptoms, and loss of taste and smell. However, they do not exhibit shortness of breath, dyspnea, or abnormal chest imaging. <sup>2</sup>Moderate Illness: Individuals who display evidence of lower respiratory disease during clinical assessment or imaging and maintain an oxygen saturation measured by pulse oximetry (SpO<sub>2</sub>) of  $\geq 94\%$  while breathing room air at sea level. <sup>3</sup>Severe Illness: Individuals with a SpO<sub>2</sub> measurement of  $< 94\%$  on room air at sea level, a ratio of arterial partial pressure of oxygen to fraction of inspired oxygen (PaO<sub>2</sub>/FiO<sub>2</sub>) below 300 mm Hg, a respiratory rate exceeding 30 breaths per minute, or lung infiltrates covering more than 50% of their lung field.

Table S2: List of synthesized peptides covering the entire sequence of spike protein (P0DTC2, Uniprot database) from SARS-CoV-2. Positive controls (F3, F4, F5, F11, F12, F13) and negative controls (F9, F17). The overlapping of positive peptides defined by the epitopes is labeled in red.

| Spot | Peptide Sequence |
|------|------------------|------|------------------|------|------------------|------|------------------|
| A1   | IHLVNNESEVIVHK   | C17  | LSETKCTLSFTVEK   | F9   | NCTEVPVAIHADQLT  | I1   | DSLSTASALGKLQD   |
| A2   | GYPKDGNAFNLDRI   | C18  | CTLKSFTVEKGIYQT  | F10  | PVAIHADQLTPTWRV  | I2   | TASALGKLQDVVNQN  |
| A3   | KEVPALTAVETGATN  | C19  | FTVEKGIYQTSNFRV  | F11  | ADQLTPTWRVYSTGS  | I3   | GKLQDVVNQNAQALN  |
| A4   | YPYDVPDYAGYPYDV  | C20  | GIYQTSNFRVQPTES  | F12  | PTWRVYSTGSNVFQT  | I4   | VVNQNAQALNTLVKQ  |
| A5   |                  | C21  | SNFRVQPTESIVRFP  | F13  | YSTGSNVFQTRAGCL  | I5   | AQALNTLVKQLSSNF  |
| A6   | MFVFLVLLPLVSSQC  | C22  | QPTESIVRFPNITNL  | F14  | NVFQTRAGCLIGAEH  | I6   | TLVKQLSSNFGAISS  |
| A7   | VLLPLVSSQCVNLTT  | C23  | IVRFPNITNLCPFGE  | F15  | RAGCLIGAEHVNNYSY | I7   | LSSNFGAISSVLNDI  |
| A8   | VSSQCVNLTTTRTQLP | C24  | NITNLCPFGEVFNAT  | F16  | IGAEHVNNSYECDIP  | I8   | GAISSVLNDILSRLD  |
| A9   | VNLTTTRTQLPPAYTN | D1   | CPFGEVFNATRFASV  | F17  | VNNSYECDIPIGAGI  | I9   | VLNDILSRLDKVEAE  |
| A10  | RTQLPPAYTNSFTRG  | D2   | VFNATRFASVYAWNR  | F18  | ECDIPIGAGICASYQ  | I10  | LSRLDKVEAEVQIDR  |
| A11  | PAYTNSFTRGVVYPD  | D3   | RFASVYAWNRKRISN  | F19  | IGAGICASYQTQTNS  | I11  | KVEAEVQIDRLITGR  |
| A12  | SFTRGVVYPDKVFRS  | D4   | YAWNRKRISNCVADY  | F20  | CASYQTQTNSPRRAR  | I12  | VQIDRLITGRLQSLQ  |
| A13  | VVYPDKVFRSSVLHS  | D5   | KRISNCVADYSVLYN  | F21  | TQTNSPRRARSVASQ  | I13  | LITGRLQSLQTYVTQ  |
| A14  | KVFRSSVLHSTQDLF  | D6   | CVADYSVLVNSASF   | F22  | PRRARSVASQSIIAY  | I14  | LQSLQTYVTQQLIRA  |
| A15  | SVLHSTQDLFLPFFS  | D7   | SVLVNSASFSTFKCY  | F23  | SVASQSIIAYTMSLG  | I15  | TYVTQQLIRAAEIRA  |
| A16  | TQDLFLPFFSNVTWF  | D8   | SASFSTFKCYGVSPT  | F24  | SIIAYTMSLGAENSV  | I16  | QLIRAAEIRASANLA  |
| A17  | LPFFSNVTWFHAIHV  | D9   | TFKCYGVSPTKLNLD  | G1   | TMSLGAENSVAYSNN  | I17  | AEIRASANLAATKMS  |
| A18  | NVTWFHAIHVSGTNG  | D10  | GVSPTKLNLCFTNV   | G2   | AENSVAYSNNIAIP   | I18  | SANLAATKMSECVLG  |
| A19  | HAIHVSGTNGTKRFD  | D11  | KLNDLCFTNVYADSF  | G3   | AYSNNIAIPTNFTI   | I19  | ATKMSECVLGQSKRV  |
| A20  | SGTNGTKRFDNPVLP  | D12  | CFTNVYADSFVIRGD  | G4   | SIAIPTNFTISVTTE  | I20  | ECVLGQSKRVDFCGK  |
| A21  | TKRFDNPVLPFNDGV  | D13  | YADSFVIRGDEVIRQI | G5   | TNFTISVTTEILPVS  | I21  | QSKRVDFCGKGYHLM  |
| A22  | NPVLPFNDGVYFAST  | D14  | VIRGDEVIRQIAPGQT | G6   | SVTTEILPVSMTKTS  | I22  | DFCGKGYHLMSPQS   |
| A23  | FNDGVYFASTSKSNI  | D15  | EVIRQIAPGQTGKIAD | G7   | ILPVSMTKTSVDCTM  | I23  | GYHLMSPQSAPHGV   |
| A24  | YFASTSKSNIIRGWI  | D16  | APGQTGKIADYNYKL  | G8   | MTKTSVDCTMYICGD  | I24  | SFPQSAPHGVVFLHV  |
| B1   | EKSNIIRGWIFGTTL  | D17  | GKIADYNYKLPPDFT  | G9   | VDCTMYICGDSTEC   | J1   | APHGVVFLHVTYVPA  |

|     |                  |     |                 |     |                 |     |                 |
|-----|------------------|-----|-----------------|-----|-----------------|-----|-----------------|
| B2  | IRGWIFGTTLDSKTQ  | D18 | YNYKLPPDFTGCVIA | G10 | YICGDSTECSNLLLQ | J2  | VFLHVTYVPAQEKNF |
| B3  | FGTTLDSKTQSLLIV  | D19 | PDDFTGCVIAWNSNN | G11 | STECSNLLLQYGSFC | J3  | TYVPAQEKNFTTAPA |
| B4  | DSKTQSLLIVNNATN  | D20 | GCVIAWNSNNLDSKV | G12 | NLLLQYGSFCTQLNR | J4  | QEKNFTTAPAICHDG |
| B5  | SLLIIVNNATNVVIKV | D21 | WNSNNLDSKVGNYN  | G13 | YGSFCTQLNRALTGI | J5  | TTAPAICHDGKAHFP |
| B6  | NNATNVVIKVCEFAQF | D22 | LDSKVGGNYNYLYRL | G14 | TQLNRALTGIAVEQD | J6  | ICHDGKAHFPREGVF |
| B7  | VVIKVCEFAQCNDPF  | D23 | GGNYNYLYRLFRKSN | G15 | ALTGIAVEQDKNTQE | J7  | KAHFPREGVFVSNGT |
| B8  | CEFAQCNDPFLGVYY  | D24 | YLYRLFRKSNLKPFE | G16 | AVEQDKNTQEVFAQV | J8  | REGVFVSNGTHWFVT |
| B9  | CNDPFLGVYYHKNNK  | E1  | FRKSNLKPFERDIST | G17 | KNTQEVFAQVKQIYK | J9  | VSNGTHWFVTQRNFY |
| B10 | LGVYYHKNNKSWMES  | E2  | LKPFERDISTEIQYA | G18 | VFAQVKQIYKTPPIK | J10 | HWFVTQRNFYEPQII |
| B11 | HKNNKSWMESEFRVY  | E3  | RDISTEIQAGSTPC  | G19 | KQIYKTPPIKDFGGF | J11 | QRNFYEPQIITTDNT |
| B12 | SWMESEFRVYSSANN  | E4  | EIQAGSTPCNGVEG  | G20 | TPPIKDFGGFNFSQI | J12 | EPQIITTDNTFVSGN |
| B13 | EFRVYSSANNCTFEY  | E5  | GSTPCNGVEGFNCYF | G21 | DFGGFNFSQILPDPS | J13 | TTDNTFVSGNCDVVI |
| B14 | SSANNCTFEYVSQPF  | E6  | NGVEGFNCYFPLQSY | G22 | NFSQILPDPSKPSKR | J14 | FVSGNCDVVIGIVNN |
| B15 | CTFEYVSQPFLMDLE  | E7  | FNCYFPLQSYGFQPT | G23 | LPDPSKPSKRSFIED | J15 | CDVVIGIVNNTVYDP |
| B16 | VSQPFLMDLEGKQGN  | E8  | PLQSYGFQPTNGVGY | G24 | KPSKRSFIEDLLFNK | J16 | GIVNNTVYDPLQPEL |
| B17 | LMDLEGKQGNFKNLR  | E9  | GFQPTNGVGYQPYRV | H1  | SFIEDLLFNKVTLAD | J17 | TVYDPLQPELDSFKE |
| B18 | GKQGNFKNLREFVFK  | E10 | NGVGYQPYRVVLSF  | H2  | LLFNKVTLADAGFIK | J18 | LQPELDSFKEELDKY |
| B19 | FKNLREFVFKNIDGY  | E11 | QPYRVVLSFELLHA  | H3  | VTLADAGFIKQYGDC | J19 | DSFKEELDKYFKNHT |
| B20 | EFVFKNIDGYFKIYS  | E12 | VVLSFELLHAPATVC | H4  | AGFIKQYGDCLGDIA | J20 | ELDKYFKNHTSPDVD |
| B21 | NIDGYFKIYSKHTPI  | E13 | ELLHAPATVCGPKKS | H5  | QYGDCLGDIAARDLI | J21 | FKNHTSPDVDLGDIS |
| B22 | FKIYSKHTPINLVRD  | E14 | PATVCGPKKSTNLVK | H6  | LGDIAARDLICAQKF | J22 | SPDVDLGDISGINAS |
| B23 | KHTPINLVRDLPQGF  | E15 | GPKKSTNLVKNKCVN | H7  | ARDLICAQKFNGLTV | J23 | LGDISGINASVVNIQ |
| B24 | NLVRDLPQGFSALEP  | E16 | TNLVKNKCVNFNFNG | H8  | CAQKFNGLTVLPPLL | J24 | GINASVVNIQKEIDR |
| C1  | LPQGFSALEPLVDLP  | E17 | NKCVNFNFNGLTGTG | H9  | NGLTVLPPLLTDAMI | K1  | VVNIQKEIDRLNEVA |
| C2  | SALEPLVDLPIGINI  | E18 | FNFNGLTGTGVLTES | H10 | LPPLLTDEMIAQYTS | K2  | KEIDRLNEVAKNLNE |
| C3  | LVLDLPIGINITRFQT | E19 | LTGTGVLTESNKKFL | H11 | TDEMIAQYTSALLAG | K3  | LNEVAKNLNESLIDL |
| C4  | IGINITRFQTLALH   | E20 | VLTESNKKFLPFQQF | H12 | AQYTSALLAGTITSG | K4  | KNLNESLIDLQELGK |
| C5  | TRFQTLALHRSYLT   | E21 | NKKFLPFQQFGRDIA | H13 | ALLAGTITSGWTFGA | K5  | SLIDLQELGKYEQYI |
| C6  | LLALHRSYLTTPGDSS | E22 | PFQQFGRDIADTTDA | H14 | TITSGWTFGAGAALQ | K6  | QELGKYEQYIKWPWY |
| C7  | RSYLTTPGDSSSGWTA | E23 | GRDIADTTDAVRDPQ | H15 | WTFGAGAALQIPFAM | K7  | YEQYIKWPWYIWLGF |

|     |                 |     |                 |     |                 |     |                 |
|-----|-----------------|-----|-----------------|-----|-----------------|-----|-----------------|
| C8  | PGDSSSGWTAGAAAY | E24 | DTTDAVRDPQTLEIL | H16 | GAALQIPFAMQMAYR | K8  | KWPWYIWLGFIAGLI |
| C9  | SGWTAGAAAYYVGYL | F1  | VRDPQTLEILDITPC | H17 | IPFAMQMAYRFNGIG | K9  | IWLGFIAGLIAIVMV |
| C10 | GAAAYYVGYLQPRTF | F2  | TLEILDITPCSFGGV | H18 | QMAYRFNGIGVTQNV | K10 | IAGLIAIVMVTIMLC |
| C11 | YVGYLQPRTFLLKYN | F3  | DITPCSFGGVSVITP | H19 | FNGIGVTQNVLYENQ | K11 | AIVMVTIMLCCMTSC |
| C12 | QPRTFLLKYNENGTI | F4  | SFGGVSVITPGTNTS | H20 | VTQNVLYENQKLIAN | K12 | TIMLCCMTSCCSCLK |
| C13 | LLKYNENGTITDAVD | F5  | SVITPGTNTSNQVAV | H21 | LYENQKLIANQFNSA | K13 | CMTSCCSCLKGCCSC |
| C14 | ENGTITDAVDCALDP | F6  | GTNTSNQVAVLYQDV | H22 | KLIANQFNSAIGKIQ | K14 | CSCLKGCCSCGSCCK |
| C15 | TDAVDCALDPLSETK | F7  | NQVAVLYQDVNCTEV | H23 | QFNSAIGKIQDSLSS | K15 | GCCSCGSCCKFDEDD |
| C16 | CALDPLSETKCTLKS | F8  | LYQDVNCTEVPVAIH | H24 | IGKIQDSLSTASAL  | K16 | GSCCKFDEDDSEPVL |
|     |                 |     |                 |     |                 | K17 | FDEDDSEPVLKGVKL |
|     |                 |     |                 |     |                 | K18 | DDSEPVLKGVKLHYT |

Table S3: List of the synthesized peptides covering the sequence of RBD mutated spike proteins from SARS-CoV-2 variants. Positive controls: YPGEFADYEELREQL (*Influenza virus*), spots 09 (A, B, C, D, E and F); negative controls: QEVRY (Cowpox virus); spot 11 (A, B, C, D, E and F); KEVPALTAVETGATN (Poliovirus) spot 10 (A, B, C, D, E and F).

| Spot | Peptides        | Spot | Peptides        | Spot | Peptides        |
|------|-----------------|------|-----------------|------|-----------------|
| A1   | GGGCVADYSVLYNGG | B1   | GGGCVADYSVLYNGG | C1   | GGGCVADYSVLYNGG |
| A2   | GGGYADSFVIRGDGG | B2   | GGGYADSFVIRGDGG | C2   | GGGYADSFVIRGDGG |
| A3   | GGGYNYKLPDDFTGG | B3   | GGGYNYKLPDDFTGG | C3   | GGGYNYKLPDDFTGG |
| A4   | WNSNNLDSKVGGNYN | B4   | WNSNNLDSKVGGNYN | C4   | WNSNNLDSKVGGNYN |
| A5   | GGGLKPFERDISTGG | B5   | GGGLKPFERDISTGG | C5   | GGGLKPFERDISTGG |
| A6   | PLQSYGFQPTNGVGY | B6   | PLQSYGFQPTNGVGY | C6   | PLQSYGFQPTNGVGY |
| A7   | PLRSYSFRPPYGVGH | B7   | PLRSYSFRPPYGVGH | C7   | PLRSYSFRPPYGVGH |
| A8   | PLQSYGFRPTYGVGH | B8   | PLQSYGFRPTYGVGH | C8   | PLQSYGFRPTYGVGH |
| A9   | YPGEFADYEELREQL | B9   | YPGEFADYEELREQL | C9   | YPGEFADYEELREQL |
| A10  | KEVPALTAVETGATN | B10  | KEVPALTAVETGATN | C10  | KEVPALTAVETGATN |
| A11  | GGGQEVRYGGG     | B11  | GGGQEVRYGGG     | C11  | GGGQEVRYGGG     |
